# Supplementary material for: Optofluidic FRET lasers using aqueous quantum dots as donors
Source: Royal Society of Chemistry journal article supplement (doi:10.1039/c5lc01004g), 2015-12-01
Supplement: c5lc01004g1.pdf [file c5lc01004g1.pdf]

## Supplementary Information for

### Optofluidic FRET Lasers Using Aqueous Quantum Dots as Donors

Qiushu Chen<sup>†</sup>, Alper Kiraz<sup>†,‡,\*</sup>, and Xudong Fan<sup>†,\*</sup>

<sup>†</sup>Department of Biomedical Engineering,

University of Michigan, Ann Arbor, MI 48109, USA

<sup>‡</sup>Department of Physics, Koç University,

Rumelifeneri Yolu, Sarıyer, 34450 Istanbul, Turkey

\*[akiraz@ku.edu.tr](mailto:akiraz@ku.edu.tr)

\*[xsfan@umich.edu](mailto:xsfan@umich.edu)

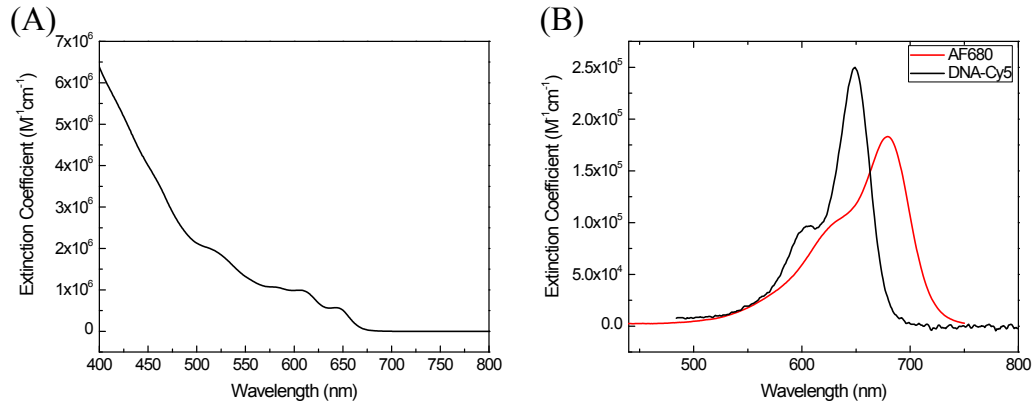

Figure S1. (A) Extinction coefficient of QDot 655 derived from absorption spectrum exported from Life Technologies® Fluorescence SpectraViewer. The extinction coefficient at 450 nm is  $4e6 \text{ M}^{-1}\text{cm}^{-1}$ . (B) Extinction coefficient of AF680 and Cy5. The extinction coefficient for AF680/Cy5 is  $1.83e5 \text{ M}^{-1}\text{cm}^{-1}/2.5e5 \text{ M}^{-1}\text{cm}^{-1}$  at 680 nm/648 nm, respectively. The absorption spectrum of AF680 is from Chroma Technology Corp® Chroma Spectra Viewer. The absorption spectrum of Cy5 is recorded by Nanodrop 2000c UV-Vis spectrometer with our DNA-Cy5 sample. The absorption cross section can be calculated from the extinction coefficient  $\epsilon$  using the following equation:

$$\sigma_a = \ln(10) \frac{1000}{N_A} \epsilon = 3.82e-21 \epsilon \text{ cm}^2$$

, where  $N_A$  is the Avogadro's constant.

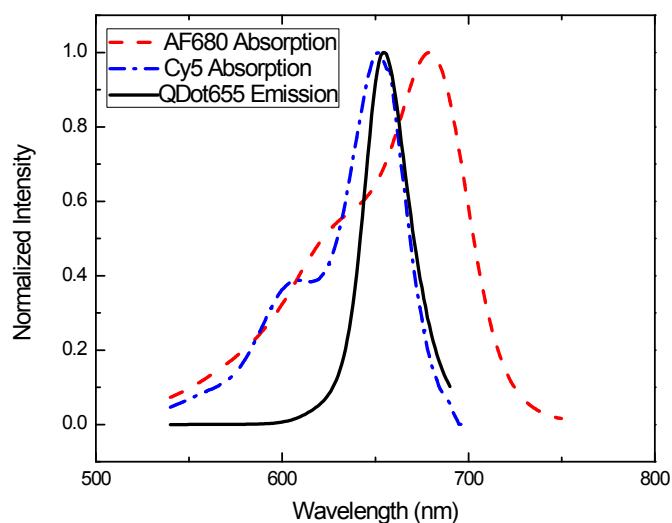

Figure S2. Emission or Absorption spectrum for QDot 655, Cy5, and AF680.

$$R_0^6 = \frac{9 \ln(10) \kappa^2 \Phi_D J}{128 \pi^5 n^4 N_A}$$

The Förster distance  $R_0$  of a FRET pair is given by

is the dipole-dipole orientation factor ( $\kappa^2 = 2/3$  for isotropically oriented dipoles),  $\Phi_D$  is the quantum yield of donor in the absence of the acceptor,  $n$  is the refractive index of the medium,  $N_A$  is Avogadro's number.  $J$  is the spectral overlap integral and

$$J = \int_0^{\infty} F_D(\lambda) \varepsilon_A(\lambda) \lambda^4 d\lambda$$

, where  $F_D$  is the normalized donor emission spectrum and  $\varepsilon_A$  is the extinction coefficient of the acceptor. The emission spectrum of QDot 655 and absorption spectrum of Cy5 and AF 680 are shown in Fig. S2. The extinction coefficient is 250,000  $M^{-1}cm^{-1}$ /183,000  $M^{-1}cm^{-1}$  for Cy5/AF680 at the absorption maximum. With a nominal quantum yield of 50% for the quantum dots,  $\kappa^2 = 2/3$  and  $n=1.33$ , the Förster distance of QDot 655-Cy5/QDot 655-AF680 pair can be calculated as 8.2 nm/7.9 nm, which means QD-Cy5 has higher intrinsic FRET transfer rate than QD-A F680.

\*QDot 655 emission spectrum is from Life Technologies® Fluorescence SpectraViewer.

\*Cy5 and AF680 absorption spectra are from Chroma Technology Corp® Chroma Spectra Viewer.

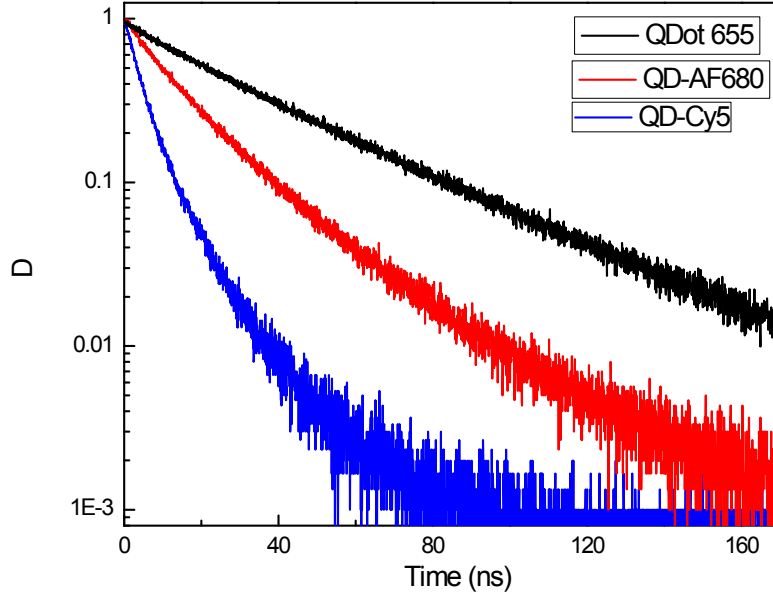

Figure S3. QD Fluorescence lifetime measurement of pure QDot 655 (black), QD-AF680 conjugate (red) and QD-Cy5 conjugate. Emission was recorded at 620 nm to avoid contribution from dye molecules for the conjugate sample.

According to fluorescence lifetime measure as shown in Fig. S3, we can derive the fluorescence lifetime of QDot 655 in each sample. For pure QDot 655, single exponential fitting gives a QD lifetime of  $\tau_0 = 34.6 \text{ ns}$ . For the conjugation samples, the data fit to second-order exponential decay. The dominant decay constant gives a total life time of 4.4 ns for QD-Cy5 sample and 12 ns for QD-AF680 sample.

$$E = 1 - \frac{\tau}{\tau_0}$$

The FRET efficiency in the conjugation can be calculated by  $E = 1 - \frac{\tau}{\tau_0}$ , where  $\tau$  is the lifetime of the QD in the presence of FRET. In the QD-Cy5 sample,  $\tau = 4.4 \text{ ns}$ ,  $E=87\%$ . In the QD-AF680 sample,  $\tau = 8.7 \text{ ns}$ ,  $E=65\%$ . The energy transfer rate can be calculated by  $k_f = \tau_f^{-1} = \tau^{-1} - \tau_0^{-1}$ . For QD-Cy5,  $k_f=(5 \text{ ns})^{-1}$ .

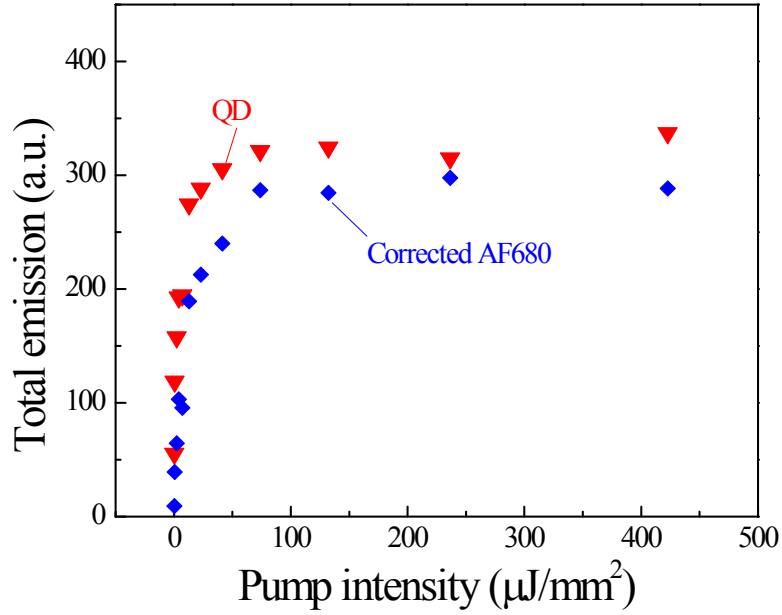

Figure S4. Fluorescence intensity of AF680 in QD-AF680 sample corrected for direct excitation in QD-AF680 sample.

AF680 emission resulting from direct excitation can be written as

$$I_{direct} = AN_{AF680}\sigma_{AF680}(450nm)q_{AF680},$$

where A is the system collection coefficient.

$N_{AF680}$  is the total concentration of AF680.  $\sigma_{AF680}$  and  $q_{AF680}$  are the absorption cross section and quantum yield, respectively. A can be derived from the slope of the QD emission. Fig. S4 shows the AF680 emission intensity after removing direct excitation contribution. We can see that the AF680 emission follows the same saturation behavior as the QD emission. The saturation in the AF680 emission is attributed to the saturation in the QD excitation (*i.e.*, single excitons). It cannot be explained by the saturation caused by direct excitation of AF680 at 450 nm, which requires a pump intensity of  $1940 \mu\text{J}/\text{mm}^2$  (*i.e.*,  $P_s = 1/\sigma_a(\lambda_p)\tau_F = 8.8e16 \text{ photons}/(\text{cm}^2 \cdot \text{ns})$ ), much higher than  $100 \mu\text{J}/\text{mm}^2$  shown in Fig. S4. Thus, we can confirm that the emission of AF680 shown in Fig. S4 is due solely to FRET through QDs.

|                                 |                          |                                              |
|---------------------------------|--------------------------|----------------------------------------------|
| $\tau_0$                        | 34.5 ns                  | Life time of pure QDs                        |
| $\tau_{QD - Cy5}$               | 4.4 ns                   | Life time of QDs in QD-Cy5                   |
| $\tau_{QD - AF680}$             | 12 ns                    | Life time of QDs in QD-AF680                 |
| $\tau_{Cy5}$                    | 1 ns                     | Life time of pure Cy5 [1]                    |
| $\tau_{AF680}$                  | 1.2 ns                   | Life time of pure AF680 [2]                  |
| $\tau_{FRET, QD - Cy5} (1/k_F)$ | 5 ns                     | FRET life time of QD-Cy5                     |
| $\sigma_{e, Cy5}(730nm)$        | 2.5e-16 cm <sup>2</sup>  | Emission cross-section of Cy5                |
| $\sigma_{a, Cy5}(500nm)$        | 3.1e-17 cm <sup>2</sup>  | Absorption cross-section of Cy5 at 500 nm    |
| $\sigma_{a, AF680}(450nm)$      | 0.95e-17 cm <sup>2</sup> | Absorption cross-section of AF680 at 450 nm. |
| $q_{AF680}$                     | 0.3                      | Quantum yield of AF680                       |
| $q_{Cy5}$                       | 0.27                     | Quantum yield of Cy5                         |
| $N_{AF680}$                     | 38 $\mu$ M               | Concentration of AF680 in QD-AF680 sample    |

Table S1. Summary of the parameters used in the main text and the Supplementary Information.

[1][http://www.iss.com/resources/reference/data\\_tables/LifetimeDataFluorophores.html](http://www.iss.com/resources/reference/data_tables/LifetimeDataFluorophores.html)

[2]<https://www.thermofisher.com/us/en/home/references/molecular-probes-the-handbook/tables/fluorescence-quantum-yields-and-lifetimes-for-alexa-fluor-dyes.html>
